# Supplementary material for: A systematic dissection of sequence elements determining β-Klotho and FGF interaction and signaling
Source: PubMed Central journal article supplement (PMC6056499; doi:10.1038/s41598-018-29396-5), 2018-07-23
Supplement: 41598_2018_29396_MOESM1_ESM.pdf [file 41598_2018_29396_MOESM1_ESM.pdf]

**A systematic dissection of sequence elements determining  $\beta$ -Klotho  
and FGF interaction and signaling**

**Sally Yu Shi, Ya-Wen Lu, Jason Richardson, Xiaoshan Min, Jennifer Weismann, William  
G. Richards, Zhulun Wang, Zhongqi Zhang, Jun Zhang, and Yang Li**

# Supplementary Figure S1

**A**

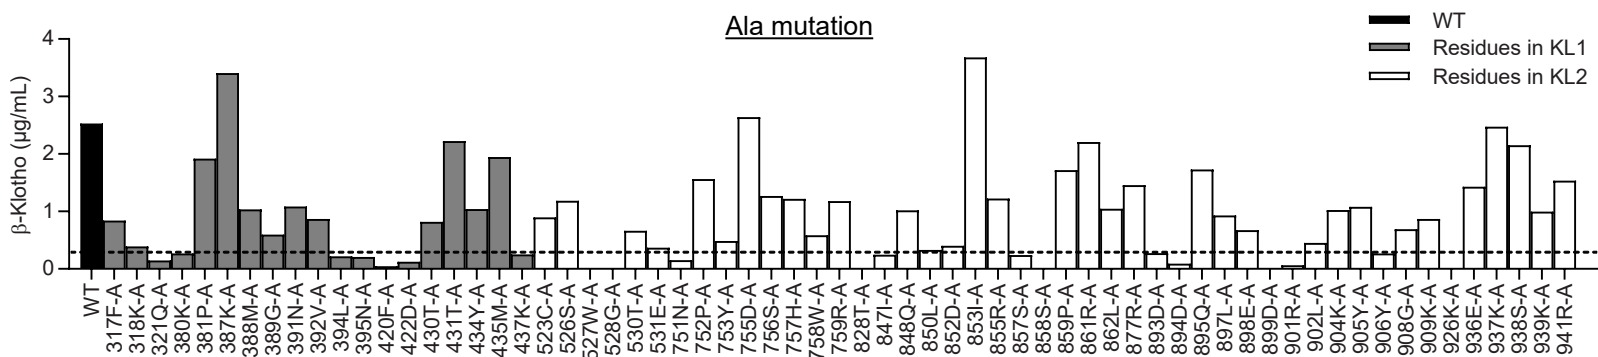

**B**

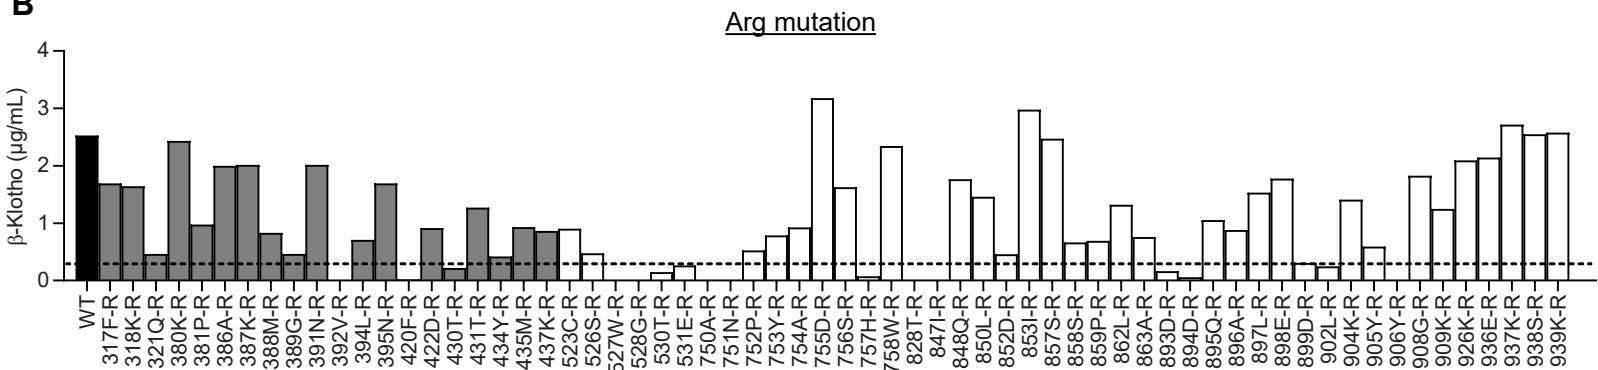

**Supplementary Figure S1.** Expression of β-Klotho (A) alanine and (B) arginine mutants in CM determined by ELISA. Dotted lines represent the cutoff point (0.3 µg/mL) for subsequent solid-phase binding assay.

## Supplementary Figure S2

**A**

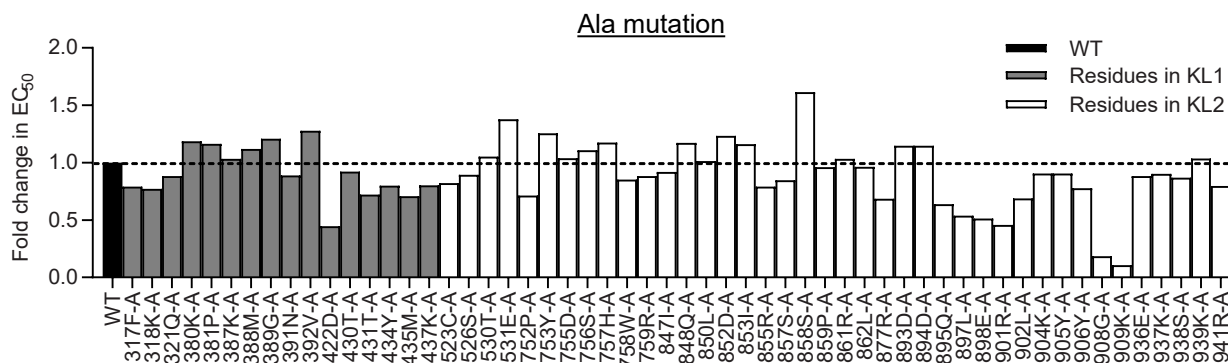

**B**

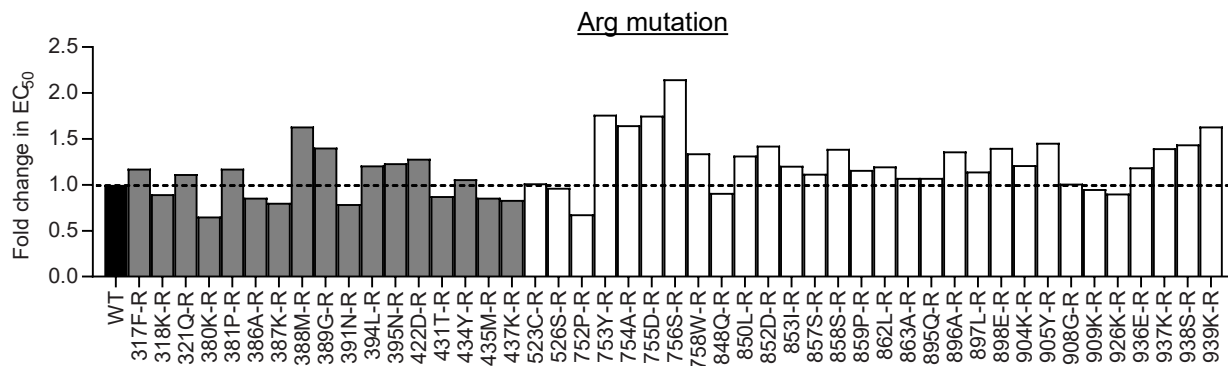

**Supplementary Figure S2.** EC<sub>50</sub> values determined from the solid-phase binding assay between  $\beta$ -Klotho and an anti- $\beta$ -Klotho antibody, 39F7, for (A) alanine and (B) arginine mutants. EC<sub>50</sub> values are expressed as fold change relative to WT CM.

### Supplementary Figure S3

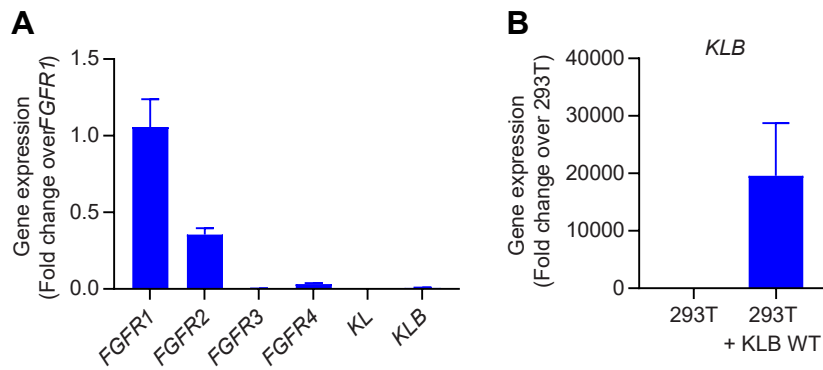

**Supplementary Figure S3.** (A) Expression of FGFR isoforms,  $\alpha$ -Klotho and  $\beta$ -Klotho in 293T cells measured by quantitative RT-PCR. (B) Expression of  $\beta$ -Klotho in 293T cells transiently transfected with full-length WT  $\beta$ -Klotho construct measured by quantitative RT-PCR. Results are mean  $\pm$  SD of two independent experiments.

## Supplementary Figure S4

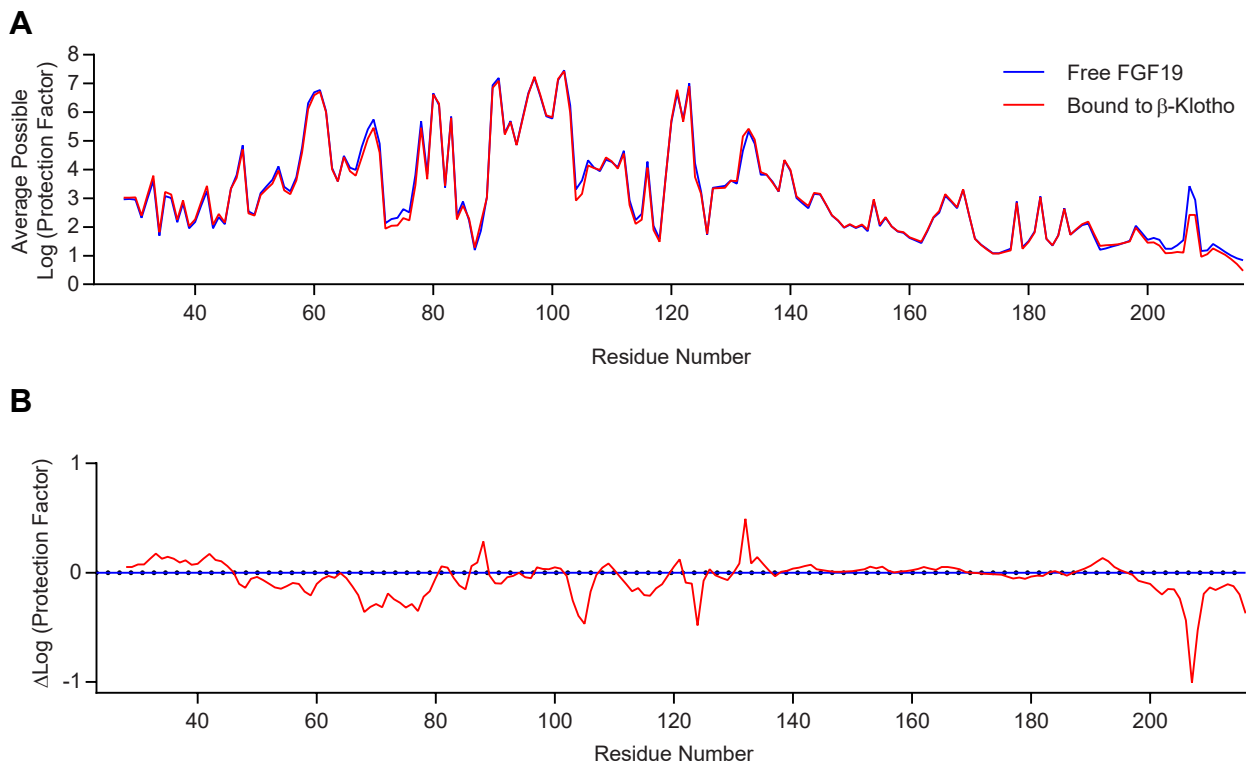

**Supplementary Figure S4.** Identification of potential  $\beta$ -Klotho interaction regions on FGF19 by HDX-MS. (A) Average possible protection factor plot and (B) differential protection factor plot of  $\beta$ -Klotho-bound and free FGF19.

## Supplementary Figure S5

**A**

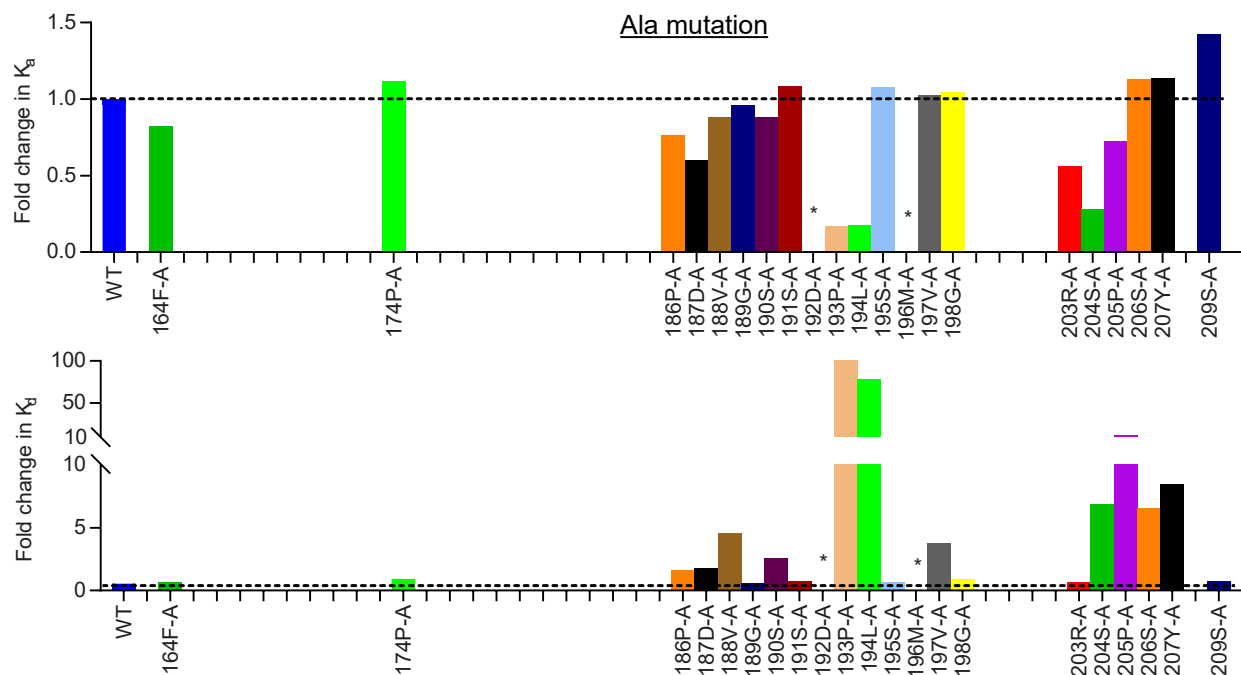

**B**

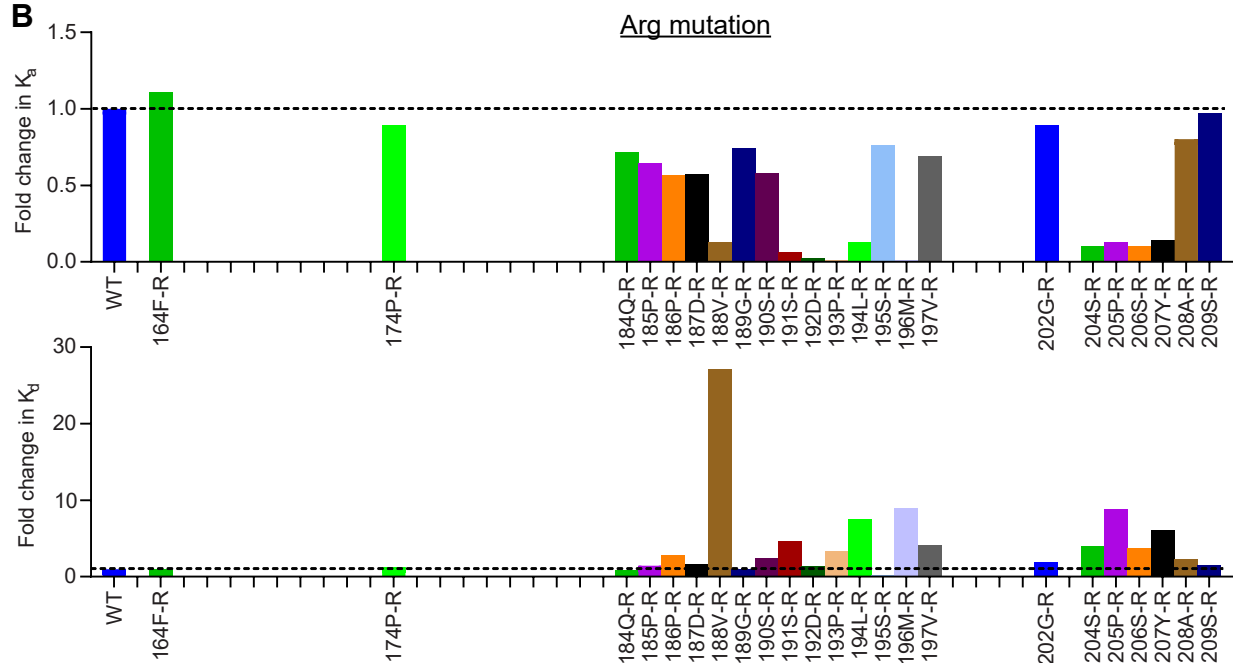

**Supplementary Figure S5.** Analysis of  $\beta$ -Klotho binding kinetics of selected Fc-FGF21 (A) alanine and (B) arginine mutants by bio-layer interferometry. Top, association rate constant ( $K_a$ ); bottom, dissociation rate constant ( $K_d$ ). Values are expressed as fold change relative to WT. \*, could not be estimated.

## Supplementary Figure S6

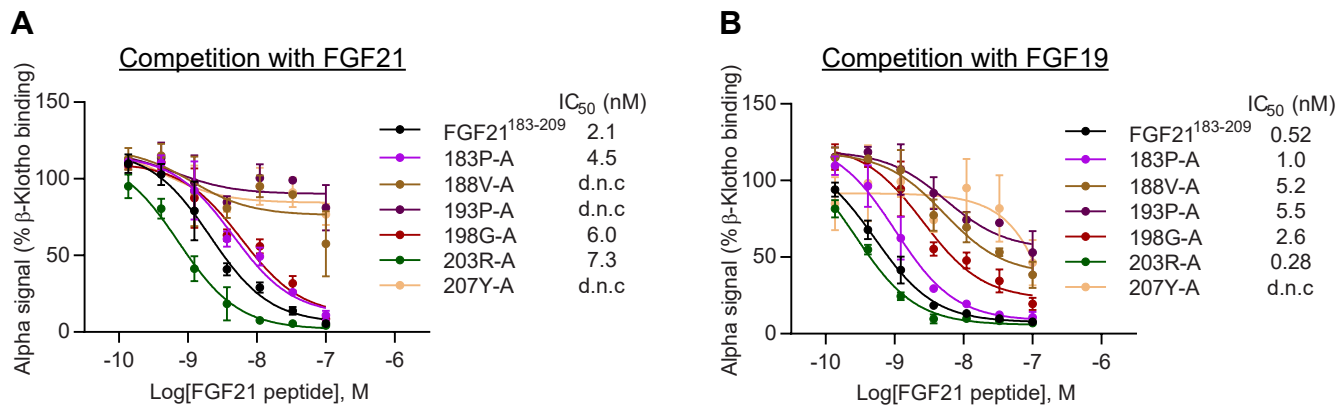

**Supplementary Figure S6.** Inhibition of  $\beta$ -Klotho binding to (A) FGF21 and (B) FGF19 by FGF21 C-terminal mutant peptides measured using AlphaScreen. d.n.c., did not converge.

## Supplementary Figure S7

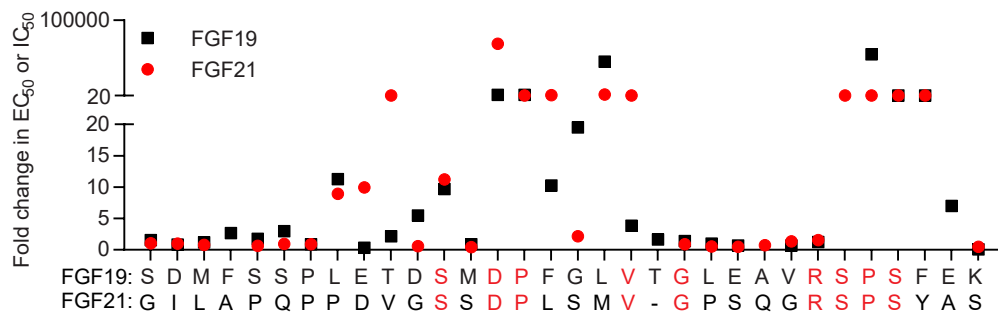

**Supplementary Figure S7.**  $IC_{50}$  of FGF19 mutant peptides and  $EC_{50}$  of Fc-FGF21 alanine mutants graphed along aligned C-terminal sequences. Conserved residues are colored in red.
